# Supplementary material for: Multiple metal binding to 6-oxopurine nucleobases as a source of deprotonation. The role of metal ions at N7 and N3
Source: Royal Society of Chemistry journal article supplement (doi:10.1039/b603650c), 2006-01-01
Supplement: b603650c.pdf [file b603650c.pdf]

**Multiple metal binding to 6-oxopurine nucleobases as a source of deprotonation.  
The role of metal ions at N7 and N3.<sup>+</sup>**

**Marta Morell Cerdà,<sup>a</sup> David Amantia,<sup>b</sup> Burkhard Costisella,<sup>a</sup> Andrew Houlton,<sup>\*b</sup> and  
Bernhard Lippert<sup>\*a</sup>**

*a* *Fachbereich Chemie, Universität Dortmund, 44221 Dortmund, Germany*  
*E-mail:* Bernhard.Lippert@uni-dortmund.de; *Fax:* ++49-231-755-3797;  
*Tel.:* ++49-231-755-3840

*b* *School of Natural Sciences : Chemistry, University of Newcastle upon Tyne, Newcastle upon Tyne, NE1 7RU, UK ;*  
*E-mail:* Andrew.Houlton@ncl.ac.uk; *Fax:* ++44-191-222-6929

Supporting Information

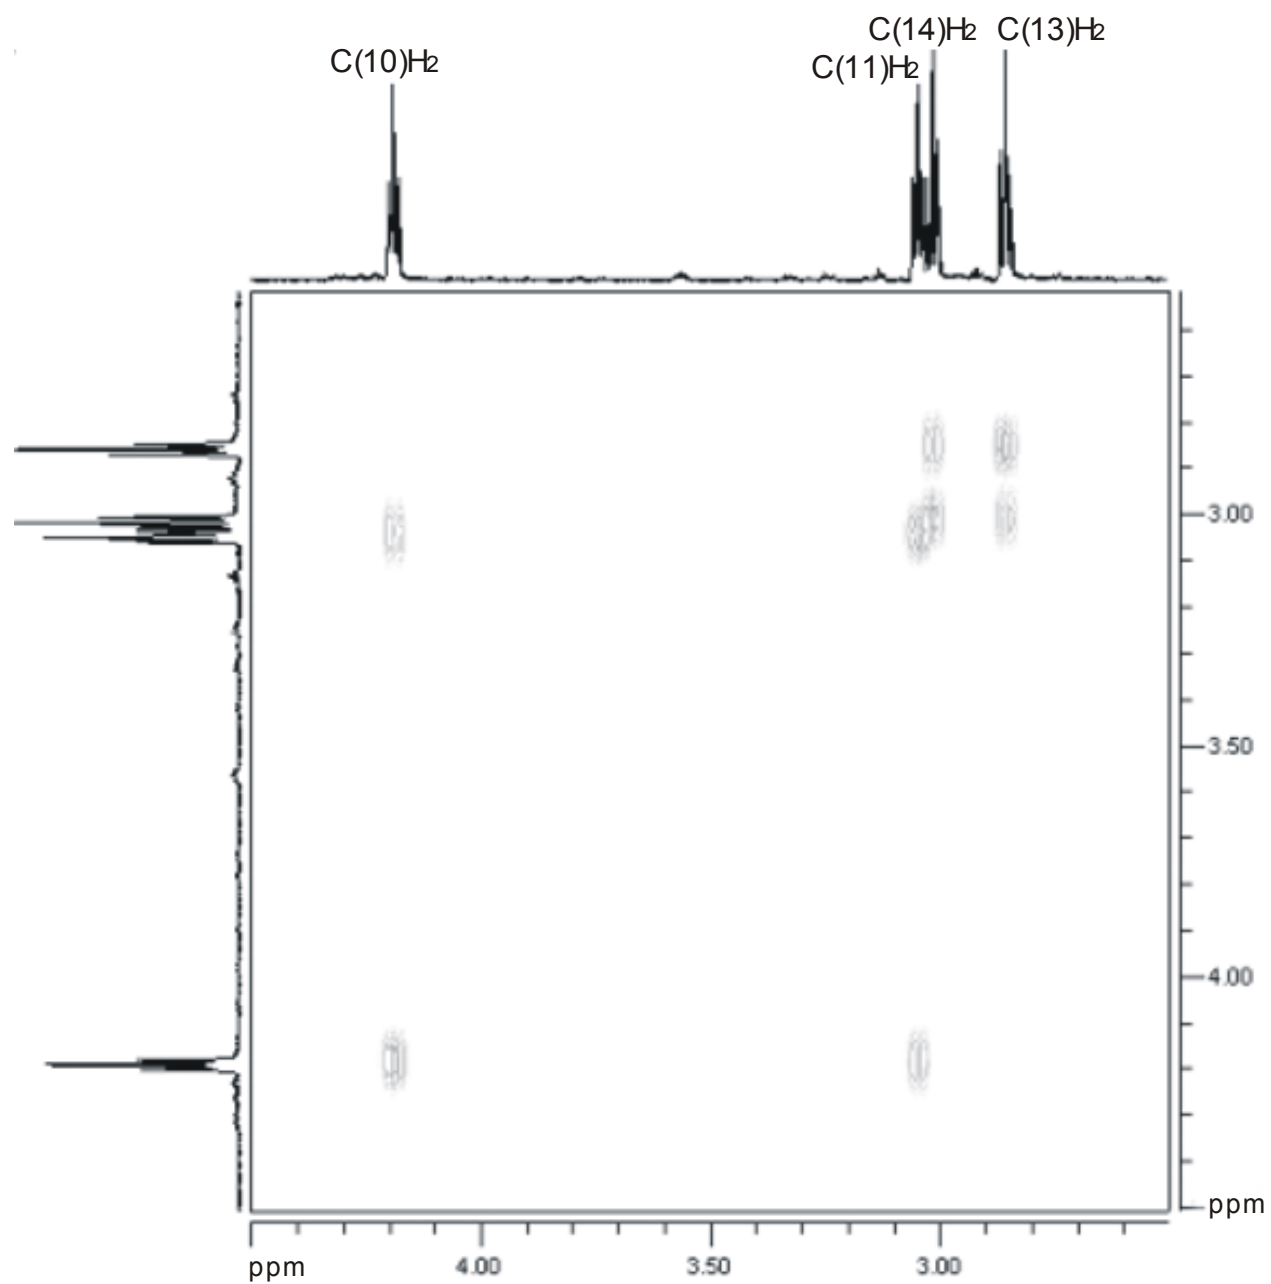

Figure S1

$^1\text{H}$ ,  $^1\text{H}$  COSY of  $\text{CH}_2$  resonances of G-Et-en in  $\text{D}_2\text{O}$ , pH 9.2.

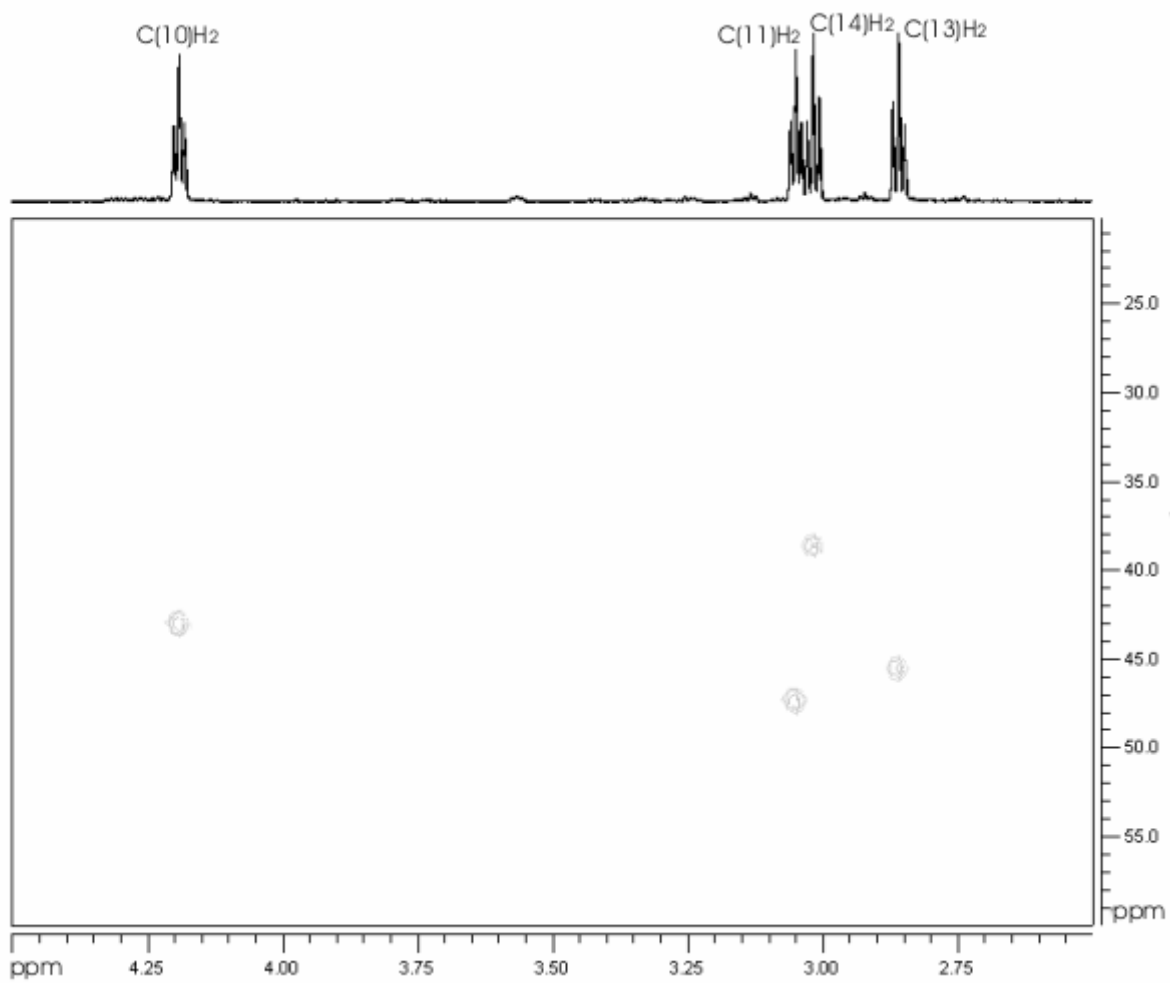

Figure S2

$^1\text{H}$ ,  $^{13}\text{C}$  COSY of G-Et-en in  $\text{D}_2\text{O}$ , pH 9.2.

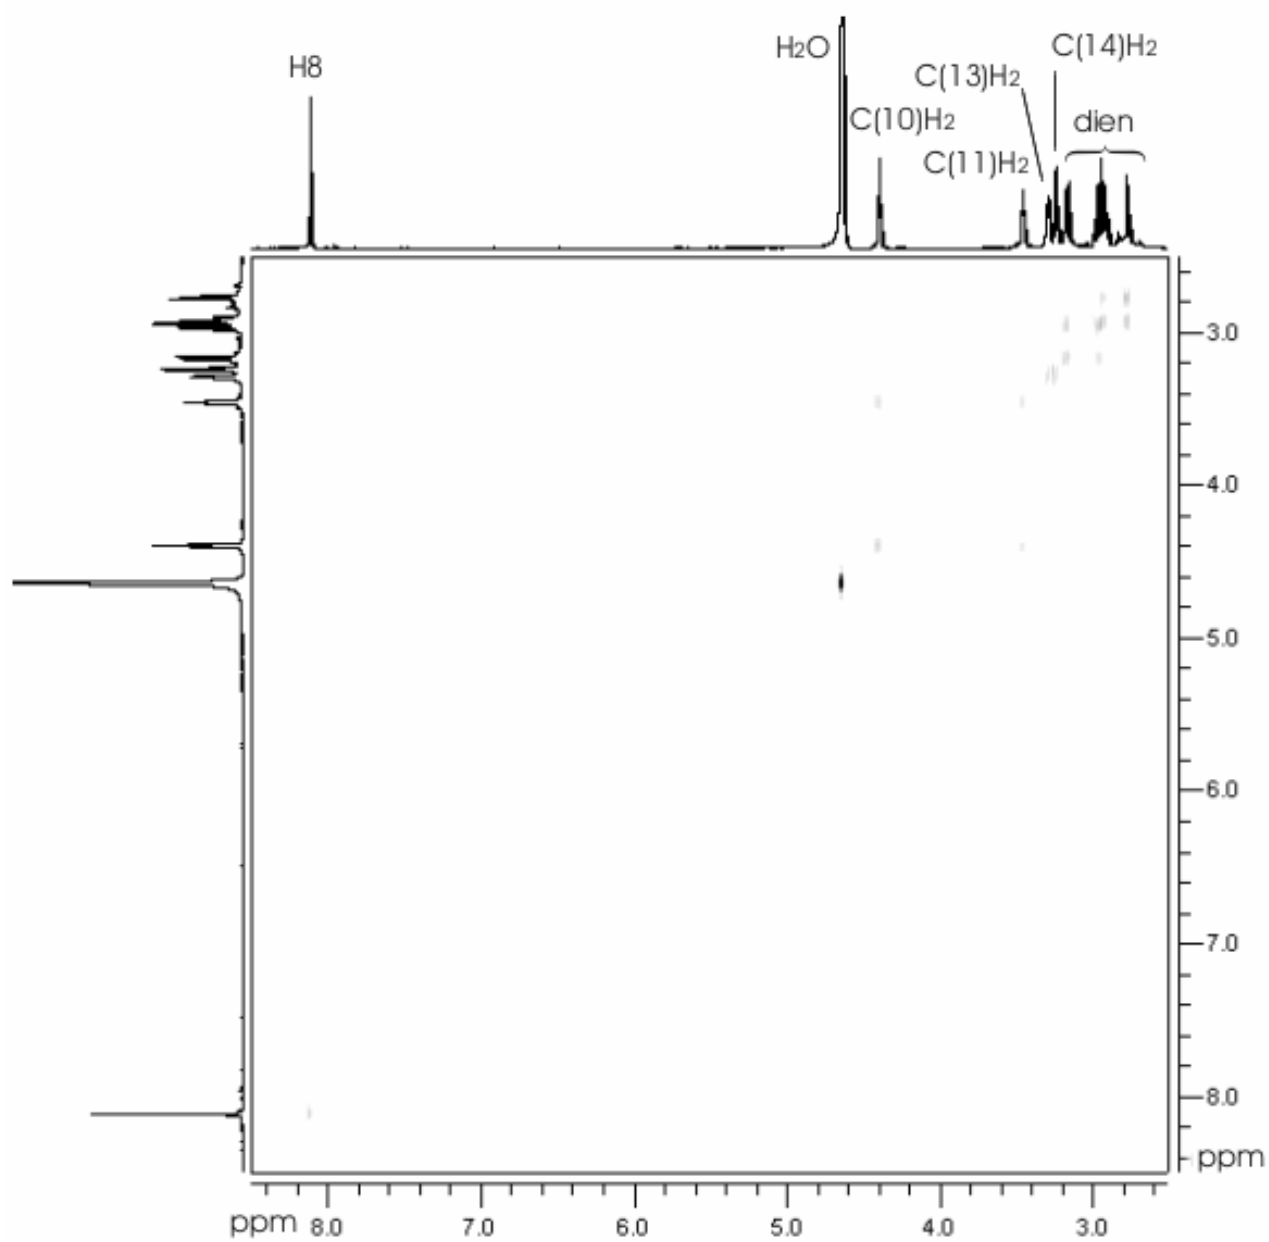

Figure S3

$^1\text{H}$ ,  $^1\text{H}$  COSY of  $[(\text{dien})\text{Pt}(\text{G-Et-en})]^{n+}$  (**1**),  $\text{D}_2\text{O}$ , pH 5.

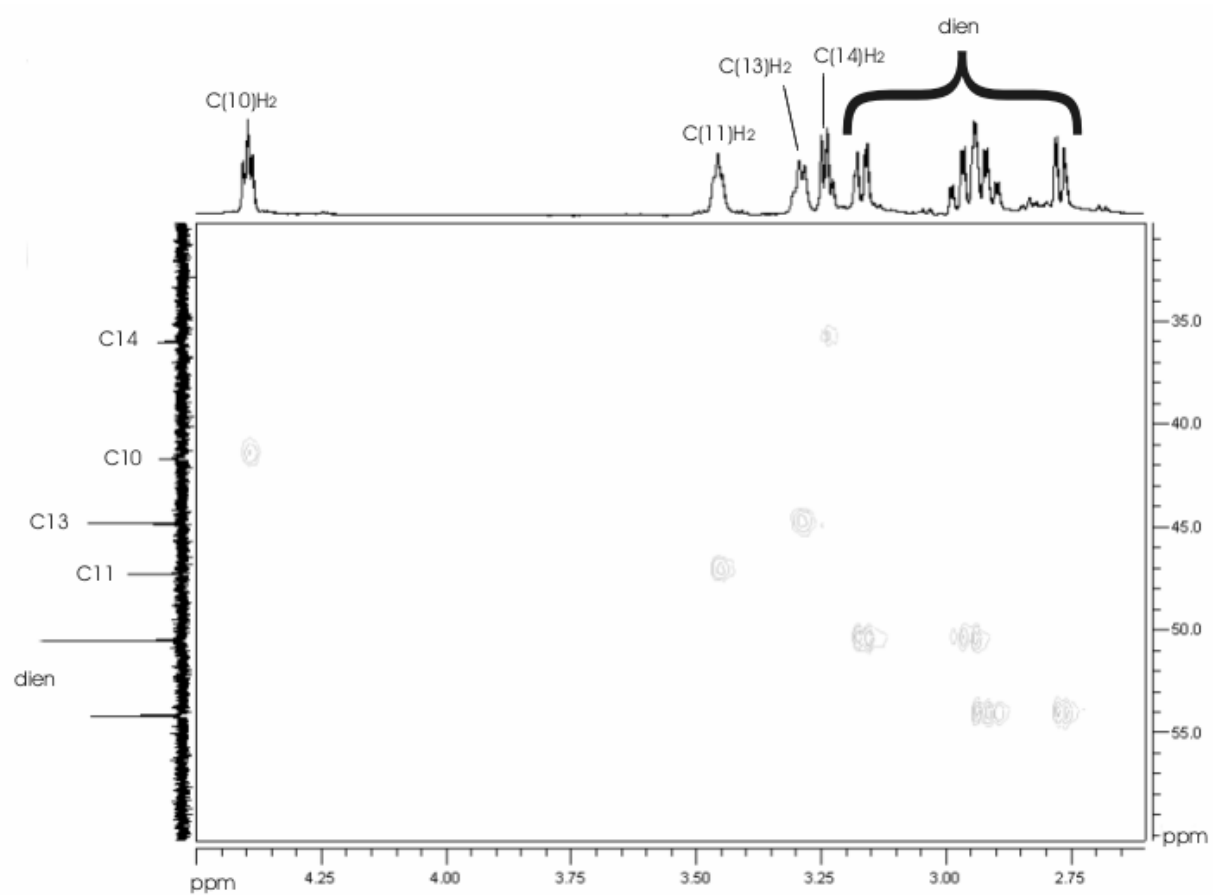

Figure S4

$^1\text{H}$ ,  $^{13}\text{C}$  COSY of of  $[(\text{dien})\text{Pt}(\text{G-Et-en})]^{n+}$  (**1**),  $\text{D}_2\text{O}$ , pD 5.
